# Supplementary material for: Assessing introgressive hybridization in roan antelope (Hippotragus equinus): Lessons from South Africa
Source: PLOS journal article supplement (doi:10.1371/journal.pone.0213961), 2019-10-18

S1 Fig. a) Probability (-LnPr) of  $K = 1 - 6$  averaged over 5 runs. b) Delta K values for real population structure  $K = 1 - 6$

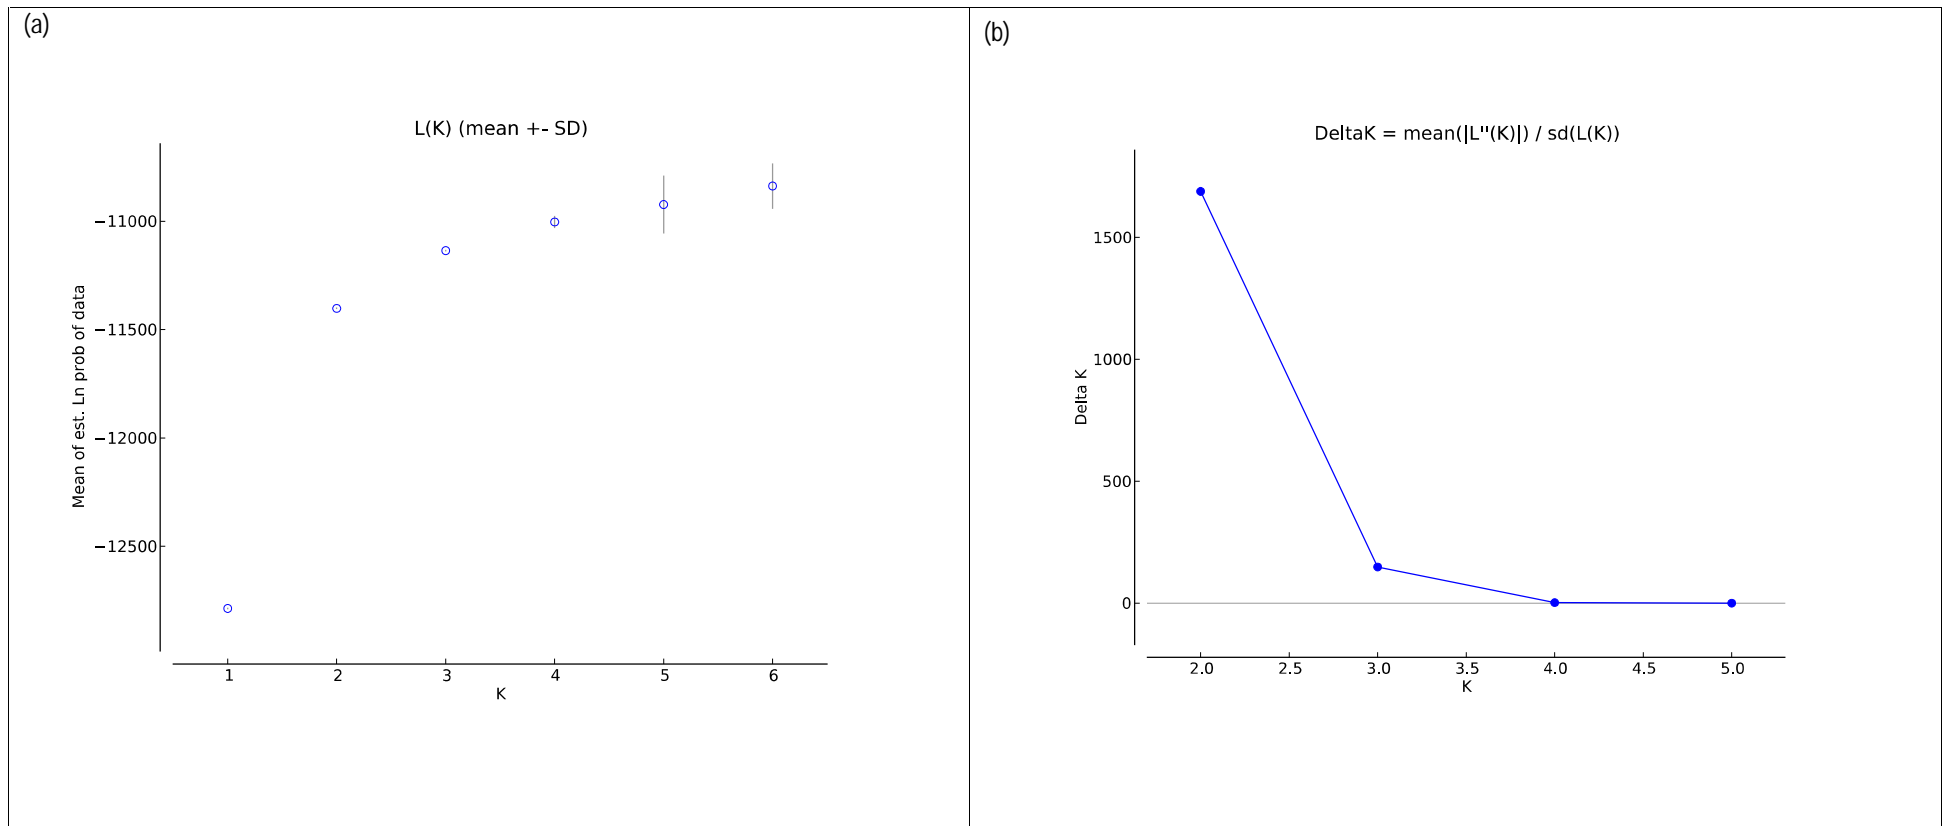

Supplement: S1 (10.1371/journal.pone.0213961.s001) [file journal.pone.0213961.s001]
